# Supplementary material for: Simulating the Motion Underlying the Mechanism of Thioredoxin Reductase
Source: PubMed Central journal article supplement — ACS Omega. 2024 Jun 25;9(27):29682–90. doi: 10.1021/acsomega.4c01382 (PMC11238311; doi:10.1021/acsomega.4c01382), 2024-06-25
Supplement: ao4c01382_si_001.pdf [file ao4c01382_si_001.pdf]

Supplemental material belonging to

SIMULATING THE MOTION UNDERLYING THE MECHANISM OF  
THIOREDOXIN REDUCTASE

Erik R.P. Zuiderweg<sup>1,2\*</sup>, David A. Case<sup>3</sup> and Charles H. Williams, Jr.<sup>1,4</sup>

(1) *Department of Biological Chemistry,*

*The University of Michigan Medical School, Ann Arbor, MI 48109, USA.*

(2) *Institute for Molecules and Materials, Faculty of Science,*

*Radboud University, 6525 XZ Nijmegen, The Netherlands*

(3) *Department of Chemistry & Chemical Biology*

*Rutgers University, Piscataway, NJ 08854, USA*

(4) *Deceased*

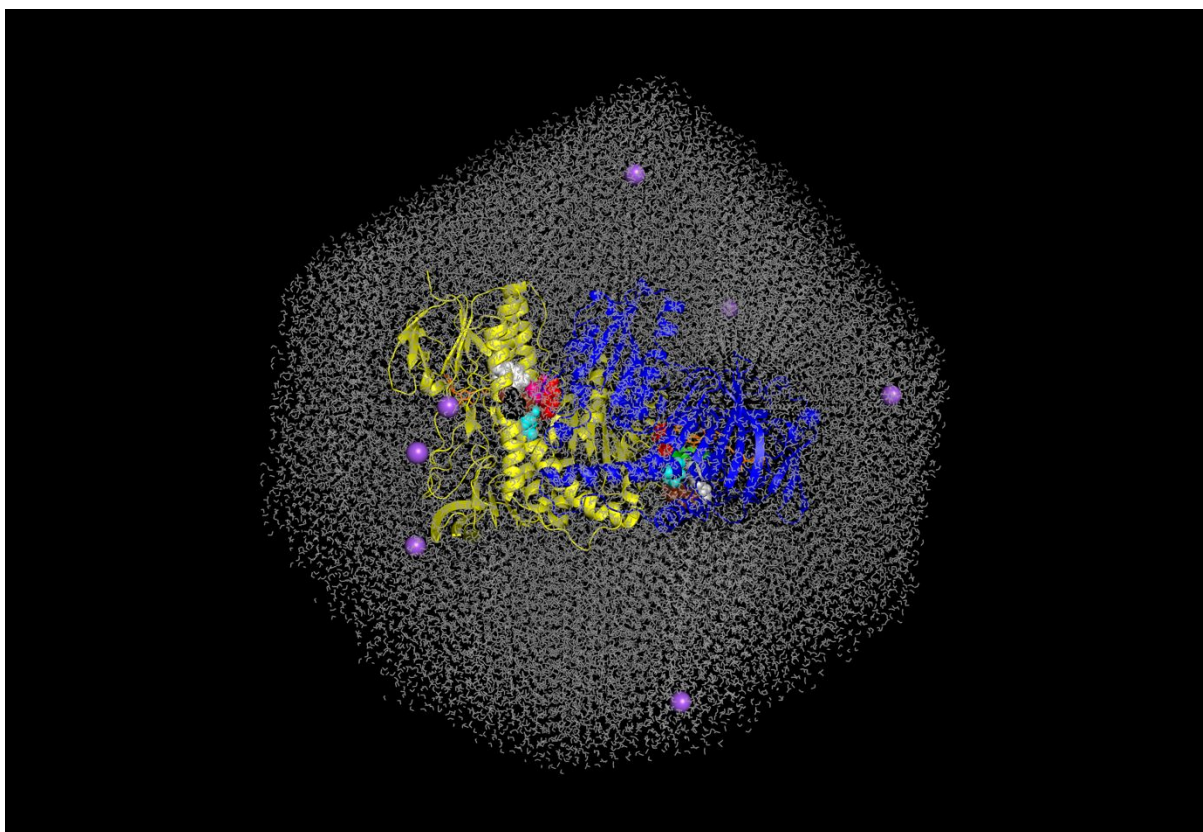

Figure S1.  
Starting configuration for the MD simulation of the full TrxR dimer, embedded in explicit OPC water, with 7 Na<sup>+</sup> counter ions.

### **MOVIE\_A\_SS\_md10\_16\_1\_210\_DETAIL.mpg**

Dynamics of the complete TrxR dimer in water.

The central dimer chains C (yellow) and D (blue) of 2J3N. pdb. FADs are orange, the Cys59/64 active site pairs are green. The Cys-488/489 shuttles are magenta. Tyr-116 is white. Leu-103 is brown. Ile-65 is Cyan, and His-472 is red.

Dynamics of the system with the shuttle in disulfide state, 37 °C. Each frame is 1 ns. Total simulation was 500 ns, here showing the first 200 ns. Water molecules have been removed for the movie. The movie starts with the shuttle disulfide docked against Tyr-116 and Leu-103 at around 11 Å from Cys-59/64 as in the crystal structure. At 88 ns shuttle is fully at the “left” of Tyr-116, Leu-103, Ile-65 and His-472, which form a barricade for shuttle access to the active site. At 201 ns the shuttle has broken through the barricade and is at 4.7 Å of Cys - 59.

### **MOVIE\_B\_SS\_md10\_16\_1\_501\_ALL.mpg**

Dynamics of the complete TrxR dimer in water.

The central dimer chains C (yellow) and D (blue) of 2J3N. pdb. FADs are orange, the Cys59/64 active site pairs are green. The Cys-488/489 shuttles are magenta. Tyr-116 are white. Leu-103 is brown. Ile-65 is Cyan, and His-472 is red. Residues Ser-111 (black) indicate the (approximate) docking site of Thioredoxin.

Dynamics of the system with the shuttle in disulfide state, 37 °C. Each frame is 1 ns. Total simulation was 500 ns. Starting position is with the shuttle docked against Tyr116 and Leu-103.

### **MOVIE\_C\_ANION\_md8\_1\_1250.mpg**

Dynamics of the complete TrxR dimer in water.

The central dimer chains C (yellow) and D (blue) of 2J3N. pdb. FADs are orange, the Cys59/64 active site pairs are green. The Cys-488/489 shuttles are magenta. Tyr-116 are white. Leu-103 is brown. Ile-65 is Cyan, and His-472 is red. Residues Ser-111 (black) indicate the (approximate) docking site of Thioredoxin.

Dynamics of the system with reduced shuttles, 37 °C. Each frame is 0.4 ns. Total simulation 500 ns. Water molecules have been removed for the movie. The simulation starts with the reduced shuttle of Chain D close to the Cys 59/64 disulfide of chain C (lower right). Both shuttles escape into solution, but the latter one lingers longer in the vicinity of Ser-111.

Details are shown in **MOVIE\_D\_ANION\_md8\_1\_1250\_DETAIL.mpg**

### **MOVIE\_D\_ANION\_md8\_1\_1250\_DETAIL.mpg**

At first the shuttle is very close to the Cys 59/64 disulfide, but soon it moves to and interacts with Tyr116 (white) and-Leu103 (brown). This is the “resting position” as seen in the crystal structure. Each frame is 0.4 ns. At about 2/3 of the total time, the shuttle has passed Leu103, and moves to within 4 Å of Ser111 OH. Ultimately it escapes in solution.
